# Supplementary material for: Safety, pharmacokinetics, and pharmacodynamics of SHR7280, an oral gonadotropin-releasing hormone receptor antagonist, in healthy men: a randomized, double-blind, placebo-controlled phase 1 study
Source: Springer Nature journal article supplement (doi:10.1186/s12916-023-02834-6), 2023-04-03

**Figure S1.** Dose-normalized PK parameters in different dose cohorts.

(A) Box-whisker plot of dose-normalized  $C_{\max}$  of SHR7280; (B) Box-whisker plot of dose-normalized  $AUC_{0-12}$  of SHR7280.

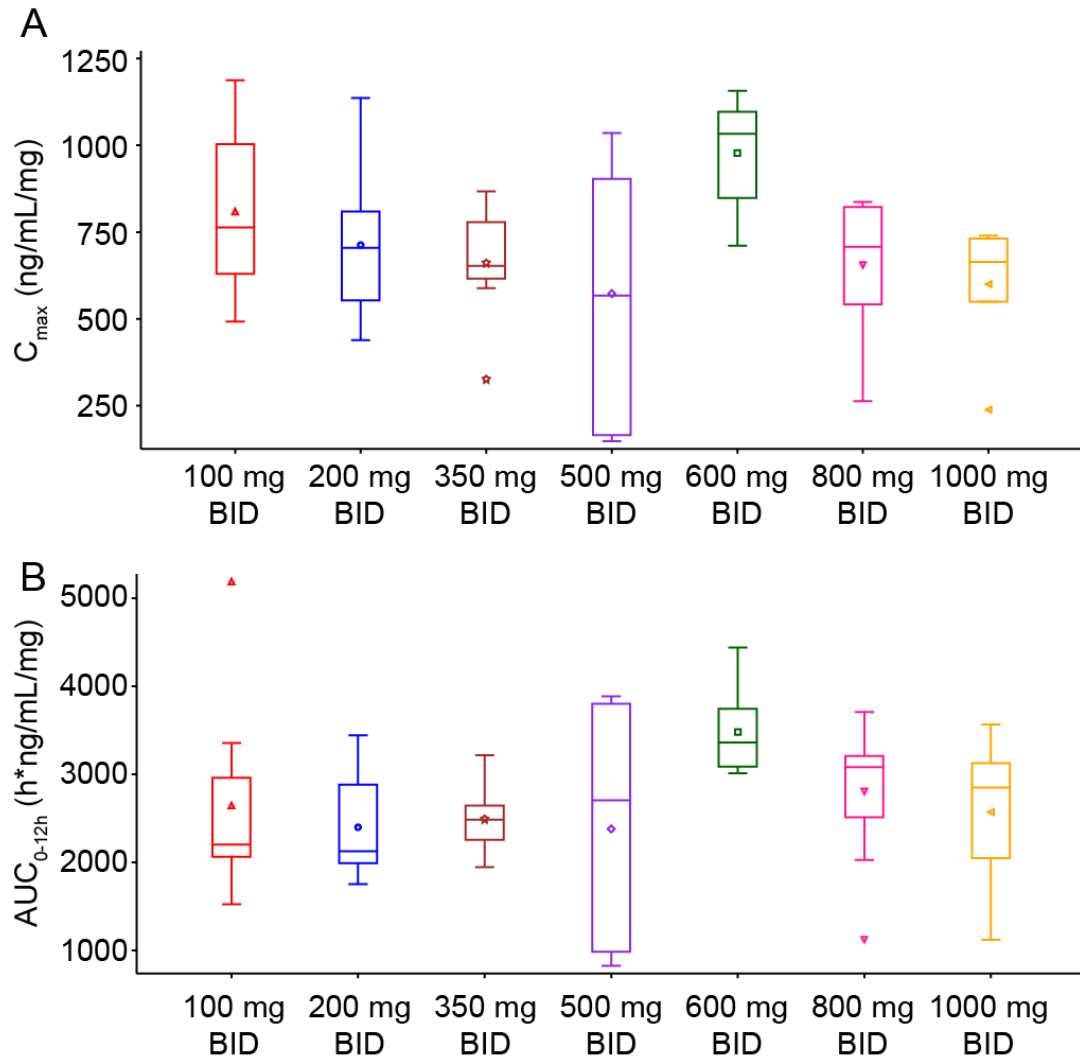

**Figure S2.** Nonlinear regression fitting of  $E_{\max}$  model demonstrated the correlations between PK and PD parameters.

(A) Correlation of LH  $AUC_{0-14d}$  with SHR7280 dose. (B) Correlation of LH  $AUC_{0-14d}$  with SHR7280  $AUC_{0-12h}$ . (C) Correlation of FSH  $AUC_{0-14d}$  with SHR7280 dose. (D) Correlation of FSH  $AUC_{0-14d}$  with SHR7280  $AUC_{0-12h}$ . (E) Correlation of T  $AUC_{0-14d}$  with SHR7280 dose. (F) Correlation of T  $AUC_{0-14d}$  with SHR7280  $AUC_{0-12h}$ .

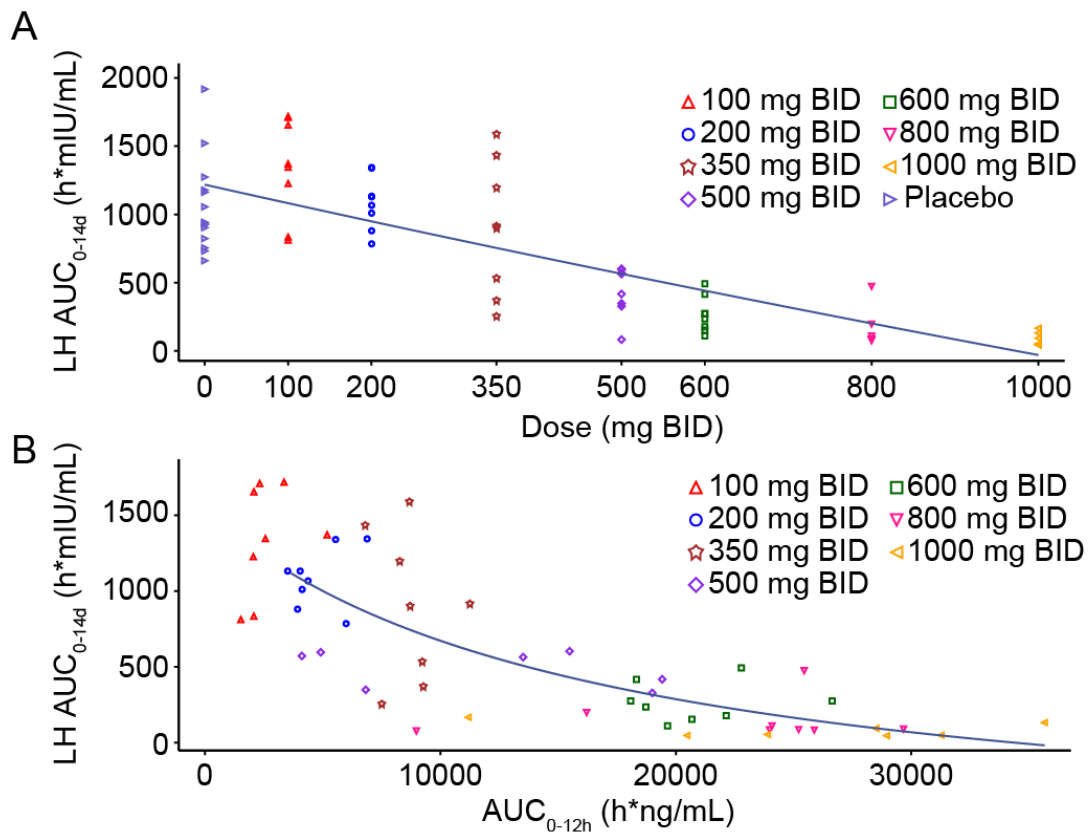

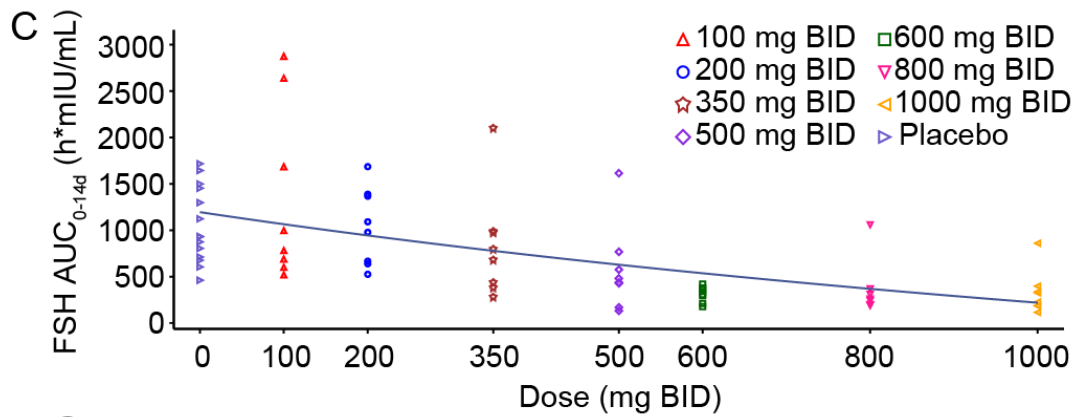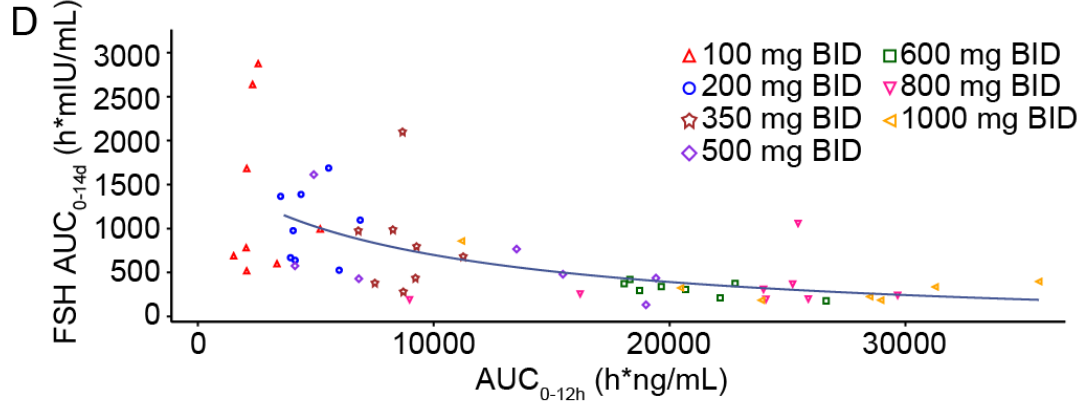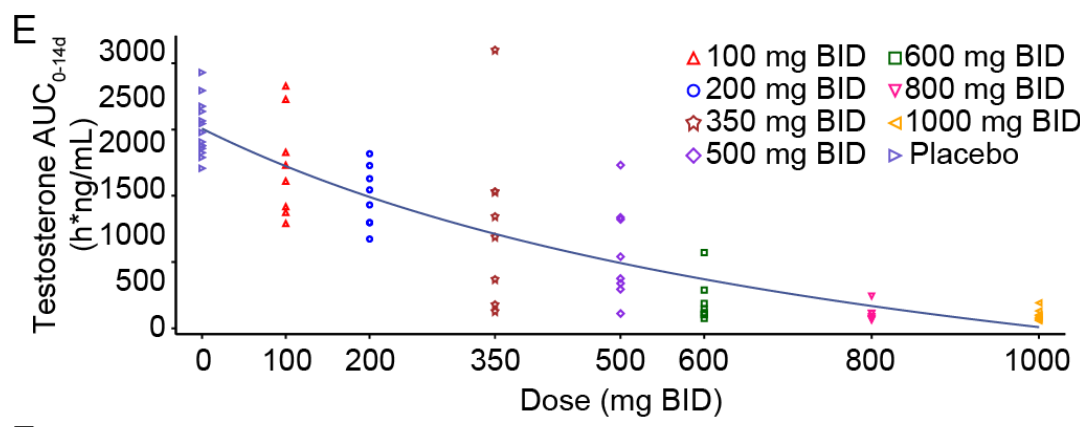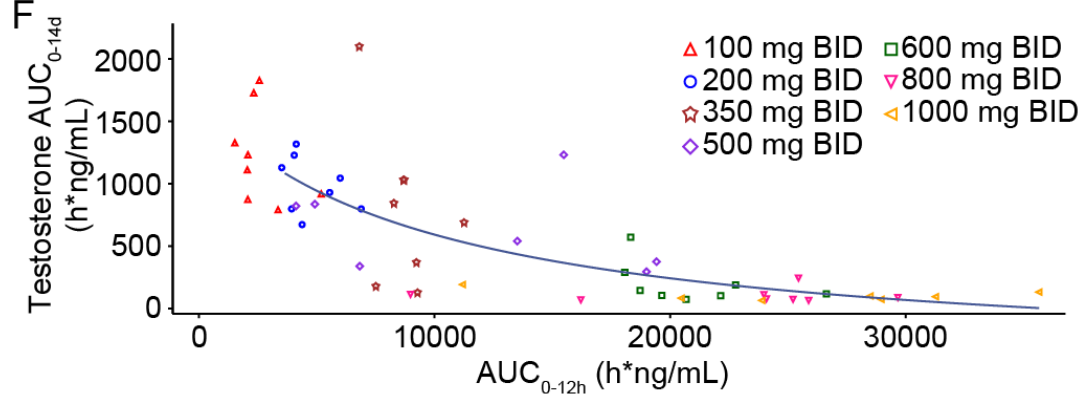

Supplement: MOESM1 [file 25202988]
